# Supplementary material for: β-LaTeBO5 and RETeBO5 (RE = Y, Gd, Tb): explorations of new optical materials in the RE(iii)–Te(iv)–B–O system
Source: Royal Society of Chemistry journal article supplement (doi:10.1039/d4qi03203a), 2025-01-01
Supplement: d4qi03203a1.pdf [file d4qi03203a1.pdf]

## Electronic supplementary information (ESI) for

# **$\beta$ -LaTeBO<sub>5</sub> and RETeBO<sub>5</sub> (RE = Y, Gd, Tb): Explorations of New Optical Materials in the RE(III)-Te(IV)-B-O System**

*Peng-Fei Chen*<sup>a,b,c</sup>, *Chun-Li Hu*<sup>a</sup>, *Ming-Zhi Zhang*<sup>a</sup>, *Jiang-Gao Mao*<sup>\*a, b, c</sup>

a State Key Laboratory of Structural Chemistry, Fujian Institute of Research on the Structure of Matter, Chinese Academy of Sciences, Fuzhou 350002, P. R. China.

b School of Physical Science and Technology, ShanghaiTech University, Shanghai 201210, P. R. China.

c University of Chinese Academy of Sciences, Beijing 100049, China.

\* Corresponding Author: [mjg@fjirsm.ac.cn](mailto:mjg@fjirsm.ac.cn)

## Table of Contents

| Section    | Title                                                                                                                                                                                            | Page  |
|------------|--------------------------------------------------------------------------------------------------------------------------------------------------------------------------------------------------|-------|
| Table S1   | Crystallographic data for $\beta$ -LaTeBO <sub>5</sub> and RETeBO <sub>5</sub> (RE= Y, Gd, Tb).                                                                                                  | S1    |
| Table S2   | Selected Bond distances (Å) and angles (°) for $\beta$ -LaTeBO <sub>5</sub> .                                                                                                                    | S2-S3 |
| Table S3   | Selected Bond distances (Å) and angles (°) for RETeBO <sub>5</sub> (RE= Y, Gd, Tb).                                                                                                              | S4-S5 |
| Table S4   | Assignment of the absorption peaks observed in the IR spectrum of $\beta$ -LaTeBO <sub>5</sub> and RETeBO <sub>5</sub> (RE = Y, Gd, Tb).                                                         | S6    |
| Table S5   | The space group, Te- $\pi$ groups FBB, energy gap and optical properties comparison of containing Te and $\pi$ -conjugate groups systems.                                                        | S7    |
| Figure S1  | The photographs of crystals for $\beta$ -LaTeBO <sub>5</sub> and RETeBO <sub>5</sub> (RE = Y, Gd, Tb).                                                                                           | S8    |
| Figure S2  | Simulated and experimental powder X-ray diffraction patterns of $\beta$ -LaTeBO <sub>5</sub> and RETeBO <sub>5</sub> (RE= Y, Gd, Tb).                                                            | S9    |
| Figure S3  | EDS spectrum of $\beta$ -LaTeBO <sub>5</sub> (a) and RETeBO <sub>5</sub> (RE = Y (b), Gd (c), Tb (d)).                                                                                           | S10   |
| Figure S4  | The coordination environment of La1 (a) and La2 (b) in $\beta$ -LaTeBO <sub>5</sub> .                                                                                                            | S11   |
| Figure S5  | Plot of lattice constant (which contains the a, b, c and V) for RETeBO <sub>5</sub> (RE = Y, Gd, Tb) against the RE <sup>3+</sup> ionic radius.                                                  | S12   |
| Figure S6  | TG curves of $\beta$ -LaTeBO <sub>5</sub> and RETeBO <sub>5</sub> (RE = Y, Gd, Tb).                                                                                                              | S13   |
| Figure S7  | Characterizations of $\beta$ -LaTeBO <sub>5</sub> and RETeBO <sub>5</sub> (RE = Y, Gd, Tb): (a) IR spectrum; (b) UV-vis-NIR diffuse reflectance spectrum; (c) converted F(R)-versus-Energy plot. | S14   |
| Figure S8  | The positive and negative rotation of compensatory, and the thickness of $\beta$ -LaTeBO <sub>5</sub> (a), YTeBO <sub>5</sub> (b) and GdTeBO <sub>5</sub> (c).                                   | S15   |
| Figure S9  | The calculated band structure of $\beta$ -LaTeBO <sub>5</sub> (a) and RETeBO <sub>5</sub> (RE = Y(b), Gd(c))                                                                                     | S16   |
| Figure S10 | Total and partial density of states of $\beta$ -LaTeBO <sub>5</sub> (a) and RETeBO <sub>5</sub> (RE = Y(b), Gd(c)).                                                                              | S17   |
| Figure S11 | Electron density difference maps of [TeO <sub>3</sub> ] <sup>2-</sup> units in $\beta$ -LaTeBO <sub>5</sub> along the <i>b</i> axis.                                                             | S18   |

**Table S1.** Crystallographic data for  $\beta$ -LaTeBO<sub>5</sub> and RETeBO<sub>5</sub> (RE = Y, Gd, Tb).

| Formula                                                                | La <sub>2</sub> Te <sub>2</sub> B <sub>2</sub> O <sub>10</sub> | YTeBO <sub>5</sub>   | GdTeBO <sub>5</sub>  | TbTeBO <sub>5</sub>  |
|------------------------------------------------------------------------|----------------------------------------------------------------|----------------------|----------------------|----------------------|
| Formula weight                                                         | 714.64                                                         | 307.32               | 375.66               | 377.33               |
| Crystal system                                                         | Monoclinic                                                     | Orthorhombic         | Orthorhombic         | Orthorhombic         |
| Space group                                                            | <i>P2<sub>1</sub>/c</i> (No. 14)                               | <i>Pbca</i> (No. 61) | <i>Pbca</i> (No. 61) | <i>Pbca</i> (No. 61) |
| T (K)                                                                  | 150.00(2)                                                      | 297.76(10)           | 150.01(10)           | 295.67(10)           |
| <i>a</i> (Å)                                                           | 16.7501(6)                                                     | 10.4579(10)          | 10.5878(5)           | 10.5343(9)           |
| <i>b</i> (Å)                                                           | 7.1820(2)                                                      | 6.5842(7)            | 6.6574(3)            | 6.6235(6)            |
| <i>c</i> (Å)                                                           | 8.3492(3)                                                      | 11.0918(15)          | 11.2141(6)           | 11.1528(11)          |
| $\beta$ (°)                                                            | 104.124(3)                                                     | 90                   | 90                   | 90                   |
| V (Å <sup>3</sup> )                                                    | 974.04(6)                                                      | 763.75(15)           | 790.45(7)            | 778.17(12)           |
| Z                                                                      | 4                                                              | 8                    | 8                    | 8                    |
| $\lambda$ (Mo-K $\alpha$ ) (Å)                                         | 0.71073                                                        | 0.71073              | 0.71073              | 0.71073              |
| <i>D<sub>c</sub></i> (g/cm <sup>-3</sup> )                             | 4.873                                                          | 5.345                | 6.313                | 6.441                |
| $\mu$ (mm <sup>-1</sup> )                                              | 14.561                                                         | 22.656               | 23.915               | 25.423               |
| GOF on <i>F</i> <sup>2</sup>                                           | 1.068                                                          | 1.083                | 1.084                | 1.113                |
| R <sub>1</sub> , wR <sub>2</sub> [ <i>I</i> > 2 $\sigma$ ( <i>I</i> )] | 0.0191, 0.0376                                                 | 0.0344, 0.0788       | 0.0228, 0.0471       | 0.0220, 0.0509       |
| R <sub>1</sub> , wR <sub>2</sub> (all data)                            | 0.0225, 0.0391                                                 | 0.0391, 0.0827       | 0.0267, 0.0489       | 0.0234, 0.0523       |

$$R_1 = \Sigma||F_o| - |F_c||/\Sigma|F_o| \text{ and } wR_2 = \{\Sigma[w(F_o^2 - F_c^2)^2]/\Sigma[wF_o^2]^2\}^{1/2}.$$

**Table S2.** Selected Bond distances (Å) and angles (°) for  $\beta$ -LaTeBO<sub>5</sub>.

| <b><math>\beta</math>-LaTeBO<sub>5</sub></b> |            |                                         |            |
|----------------------------------------------|------------|-----------------------------------------|------------|
| Selected bond distances                      |            |                                         |            |
| La1–O1 <sup>#2</sup>                         | 2.496(3)   | La2–O10 <sup>#7</sup>                   | 2.620(3)   |
| La1–O2 <sup>#3</sup>                         | 2.597(3)   | La2–O10 <sup>#8</sup>                   | 2.579(3)   |
| La1–O2 <sup>#4</sup>                         | 2.623(3)   | La2–O10 <sup>#6</sup>                   | 2.847(3)   |
| La1–O2 <sup>#1</sup>                         | 2.929(3)   | Te1–O1                                  | 1.856(3)   |
| La1–O3                                       | 2.435(3)   | Te1–O2                                  | 1.859(3)   |
| La1–O3 <sup>#1</sup>                         | 2.530(3)   | Te1–O3                                  | 1.863(3)   |
| La1–O4                                       | 2.429(3)   | Te2–O8                                  | 1.863(3)   |
| La1–O4 <sup>#2</sup>                         | 2.616(3)   | Te2–O9                                  | 1.850(3)   |
| La1–O5 <sup>#2</sup>                         | 2.750(3)   | Te2–O10                                 | 1.866(3)   |
| La2–O6 <sup>#2</sup>                         | 2.706(3)   | B1–O4                                   | 1.305(6)   |
| La2–O7                                       | 2.446(3)   | B1–O5                                   | 1.396(6)   |
| La2–O7 <sup>#2</sup>                         | 2.601(3)   | B1–O6                                   | 1.392(6)   |
| La2–O8 <sup>#6</sup>                         | 2.536(3)   | B2–O5 <sup>#2</sup>                     | 1.389(6)   |
| La2–O8                                       | 2.446(3)   | B2–O6                                   | 1.395(6)   |
| La2–O9 <sup>#2</sup>                         | 2.532(3)   | B2–O7                                   | 1.319(6)   |
| Selected bond angles                         |            |                                         |            |
| O1 <sup>#2</sup> –La1–O3 <sup>#1</sup>       | 73.25(11)  | O7–La2–O10 <sup>#7</sup>                | 67.71(10)  |
| O1 <sup>#2</sup> –La1–O2 <sup>#1</sup>       | 102.50(9)  | O7–La2–O10 <sup>#8</sup>                | 78.20(10)  |
| O1 <sup>#2</sup> –La1–O2 <sup>#3</sup>       | 125.89(10) | O7 <sup>#2</sup> –La2–O6 <sup>#2</sup>  | 51.72(9)   |
| O1 <sup>#2</sup> –La1–O2 <sup>#4</sup>       | 64.96(10)  | O7 <sup>#2</sup> –La2–O10 <sup>#5</sup> | 62.29(9)   |
| O1 <sup>#2</sup> –La1–O4 <sup>#2</sup>       | 72.30(11)  | O7 <sup>#2</sup> –La2–O10 <sup>#7</sup> | 164.98(10) |
| O1 <sup>#2</sup> –La1–O5 <sup>#2</sup>       | 77.40(12)  | O8–La2–O6 <sup>#2</sup>                 | 79.42(10)  |
| O2 <sup>#3</sup> –La1–O5 <sup>#2</sup>       | 132.22(10) | O8–La2–O7                               | 74.57(10)  |
| O2 <sup>#3</sup> –La1–O2 <sup>#1</sup>       | 105.16(10) | O8–La2–O7 <sup>#2</sup>                 | 74.23(10)  |
| O2 <sup>#4</sup> –La1–O2 <sup>#1</sup>       | 132.58(7)  | O8–La2–O8 <sup>#5</sup>                 | 124.31(8)  |
| O2 <sup>#4</sup> –La1–O2 <sup>#3</sup>       | 61.97(11)  | O8–La2–O9 <sup>#2</sup>                 | 144.13(11) |
| O2 <sup>#4</sup> –La1–O4 <sup>#2</sup>       | 136.86(10) | O8–La2–O10 <sup>#5</sup>                | 69.92(9)   |
| O2 <sup>#4</sup> –La1–O5 <sup>#2</sup>       | 111.69(10) | O8–La2–O10 <sup>#7</sup>                | 91.86(10)  |
| O3–La1–O1 <sup>#2</sup>                      | 144.96(11) | O8–La2–O10 <sup>#8</sup>                | 147.44(9)  |
| O3–La1–O2 <sup>#1</sup>                      | 70.19(9)   | O8 <sup>#5</sup> –La2–O6 <sup>#2</sup>  | 139.84(10) |
| O3–La1–O2 <sup>#3</sup>                      | 88.50(9)   | O8 <sup>#5</sup> –La2–O7 <sup>#2</sup>  | 100.01(9)  |

|                                         |            |                                          |            |
|-----------------------------------------|------------|------------------------------------------|------------|
| O3-La1-O2 <sup>#4</sup>                 | 145.02(9)  | O8 <sup>#5</sup> -La2-O10 <sup>#5</sup>  | 59.66(9)   |
| O3-La1-O3 <sup>#1</sup>                 | 122.96(8)  | O8 <sup>#5</sup> -La2-O10 <sup>#7</sup>  | 82.99(9)   |
| O3-La1-O4 <sup>#2</sup>                 | 74.38(10)  | O8 <sup>#5</sup> -La2-O10 <sup>#8</sup>  | 73.21(10)  |
| O3-La1-O5 <sup>#2</sup>                 | 73.35(10)  | O9 <sup>#2</sup> -La2-O6 <sup>#2</sup>   | 71.50(11)  |
| O3 <sup>#1</sup> -La1-O2 <sup>#1</sup>  | 58.14(9)   | O9 <sup>#2</sup> -La2-O7 <sup>#2</sup>   | 71.39(10)  |
| O3 <sup>#1</sup> -La1-O2 <sup>#3</sup>  | 83.43(10)  | O9 <sup>#2</sup> -La2-O8 <sup>#5</sup>   | 72.34(11)  |
| O3 <sup>#1</sup> -La1-O2 <sup>#4</sup>  | 74.67(10)  | O9 <sup>#2</sup> -La2-O10 <sup>#5</sup>  | 102.03(9)  |
| O3 <sup>#1</sup> -La1-O4 <sup>#2</sup>  | 98.94(9)   | O9 <sup>#2</sup> -La2-O10 <sup>#7</sup>  | 123.24(10) |
| O3 <sup>#1</sup> -La1-O5 <sup>#2</sup>  | 143.44(9)  | O9 <sup>#2</sup> -La2-O10 <sup>#8</sup>  | 63.05(10)  |
| O4-La1-O1 <sup>#2</sup>                 | 107.46(11) | O10 <sup>#7</sup> -La2-O6 <sup>#2</sup>  | 132.30(9)  |
| O4-La1-O2 <sup>#1</sup>                 | 146.36(10) | O10 <sup>#7</sup> -La2-O10 <sup>#5</sup> | 108.04(10) |
| O4-La1-O2 <sup>#3</sup>                 | 68.80(10)  | O10 <sup>#8</sup> -La2-O6 <sup>#2</sup>  | 104.69(10) |
| O4-La1-O2 <sup>#4</sup>                 | 75.49(10)  | O10 <sup>#8</sup> -La2-O7 <sup>#2</sup>  | 133.91(10) |
| O4-La1-O3                               | 76.50(10)  | O10 <sup>#8</sup> -La2-O10 <sup>#5</sup> | 132.81(7)  |
| O4-La1-O4 <sup>#2</sup>                 | 113.61(11) | O10 <sup>#8</sup> -La2-O10 <sup>#7</sup> | 61.09(11)  |
| O4-La1-O3 <sup>#1</sup>                 | 146.26(10) | O1-Te1-O2                                | 96.09(15)  |
| O4-La1-O5 <sup>#2</sup>                 | 64.14(9)   | O1-Te1-O3                                | 103.03(14) |
| O4 <sup>#2</sup> -La1-O2 <sup>#1</sup>  | 61.77(9)   | O2-Te1-O3                                | 91.90(14)  |
| O4 <sup>#2</sup> -La1-O2 <sup>#3</sup>  | 161.05(10) | O8-Te2-O10                               | 92.39(13)  |
| O4 <sup>#2</sup> -La1-O5 <sup>#2</sup>  | 50.78(9)   | O9-Te2-O8                                | 102.79(14) |
| O5 <sup>#2</sup> -La1-O2 <sup>#1</sup>  | 109.11(9)  | O9-Te2-O10                               | 94.33(14)  |
| O6 <sup>#2</sup> -La2-O10 <sup>#5</sup> | 112.35(9)  | O4-B1-O5                                 | 117.1(4)   |
| O7-La2-O6 <sup>#2</sup>                 | 64.75(9)   | O4-B1-O6                                 | 128.4(4)   |
| O7-La2-O7 <sup>#2</sup>                 | 112.60(11) | O6-B1-O5                                 | 114.4(4)   |
| O7-La2-O8 <sup>#5</sup>                 | 146.37(10) | O5 <sup>#2</sup> -B2-O6                  | 114.8(4)   |
| O7-La2-O9 <sup>#2</sup>                 | 109.74(10) | O7-B2-O5 <sup>#2</sup>                   | 128.0(4)   |
| O7-La2-O10 <sup>#5</sup>                | 144.13(10) | O7-B2-O6                                 | 117.2(4)   |

---

Symmetry transformations used to generate equivalent atoms:

#1: -X, 0.5+Y, 0.5-Z; #2: +X, 0.5-Y, -0.5+Z; #3: -X, -Y, 1-Z; #4: +X, 1+Y, +Z; #5: 1-X, -0.5+Y, 0.5-Z; #6: 1-X, 0.5+Y, 0.5-Z; #7: 1-X, 1-Y, 1-Z; #8: +X, -1+Y, +Z;

**Table S3.** Selected Bond distances (Å) and angles (°) for RETeBO<sub>5</sub> (RE = Y, Gd, Tb).

| RETeBO <sub>5</sub><br>(RE= Y, Gd, Tb) | Y          | Gd         | Tb         |
|----------------------------------------|------------|------------|------------|
| Selected bond distances                |            |            |            |
| RE1–O1 <sup>#4</sup>                   | 2.495(5)   | 2.501(4)   | 2.493(4)   |
| RE1–O1 <sup>#5</sup>                   | 2.307(4)   | 2.357(4)   | 2.335(4)   |
| RE1–O2 <sup>#4</sup>                   | 2.391(4)   | 2.441(4)   | 2.427(4)   |
| RE1–O3                                 | 2.317(4)   | 2.365(4)   | 2.350(4)   |
| RE1–O3 <sup>#2</sup>                   | 2.336(4)   | 2.371(4)   | 2.356(4)   |
| RE1–O4                                 | 2.393(4)   | 2.422(4)   | 2.410(4)   |
| RE1–O4 <sup>#3</sup>                   | 2.341(4)   | 2.387(4)   | 2.365(4)   |
| RE1–O5 <sup>#2</sup>                   | 2.452(5)   | 2.495(4)   | 2.473(5)   |
| Te1–O2                                 | 2.089(4)   | 2.074(4)   | 2.070(4)   |
| Te1–O4                                 | 1.868(5)   | 1.874(5)   | 1.873(4)   |
| Te1–O5                                 | 1.900(5)   | 1.906(4)   | 1.901(5)   |
| Te1–O5 <sup>#6</sup>                   | 2.164(5)   | 2.181(5)   | 2.174(4)   |
| B1–O1                                  | 1.356(9)   | 1.356(8)   | 1.343(7)   |
| B1–O2                                  | 1.388(9)   | 1.419(8)   | 1.406(8)   |
| B1–O3                                  | 1.364(8)   | 1.360(8)   | 1.366(7)   |
| Selected bond angles                   |            |            |            |
| O1 <sup>#5</sup> –RE1–O1 <sup>#4</sup> | 140.03(7)  | 139.84(6)  | 139.89(5)  |
| O1 <sup>#5</sup> –RE1–O2 <sup>#4</sup> | 150.56(15) | 149.87(16) | 150.18(15) |
| O1 <sup>#5</sup> –RE1–O3               | 79.16(16)  | 79.13(16)  | 79.12(14)  |
| O1 <sup>#5</sup> –RE1–O3 <sup>#1</sup> | 92.89(15)  | 92.40(15)  | 92.31(14)  |
| O1 <sup>#5</sup> –RE1–O4               | 85.44(17)  | 85.50(16)  | 85.97(15)  |
| O1 <sup>#5</sup> –RE1–O4 <sup>#3</sup> | 92.95(18)  | 93.23(15)  | 93.00(15)  |
| O1 <sup>#5</sup> –RE1–O5 <sup>#1</sup> | 70.19(17)  | 69.47(15)  | 69.61(15)  |
| O2 <sup>#4</sup> –RE1–O1 <sup>#4</sup> | 56.66(15)  | 56.71(14)  | 56.63(13)  |
| O2 <sup>#4</sup> –RE1–O4               | 71.45(16)  | 116.60(14) | 116.60(14) |
| O2 <sup>#4</sup> –RE1–O5 <sup>#1</sup> | 116.57(16) | 84.65(14)  | 85.05(14)  |
| O3–RE1–O1 <sup>#4</sup>                | 85.23(16)  | 78.37(15)  | 78.57(14)  |
| O3–RE1–O2 <sup>#4</sup>                | 79.10(15)  | 138.74(5)  | 138.71(4)  |
| O3–RE1–O3 <sup>#1</sup>                | 138.51(6)  | 79.82(15)  | 79.84(15)  |
| O3–RE1–O4                              | 80.14(17)  | 147.25(15) | 146.99(15) |

|                                        |            |            |            |
|----------------------------------------|------------|------------|------------|
| O3-RE1-O4 <sup>#3</sup>                | 146.81(17) | 63.53(14)  | 63.90(14)  |
| O3-RE1-O5 <sup>#1</sup>                | 64.09(16)  | 76.20(15)  | 75.88(13)  |
| O3 <sup>#1</sup> -RE1-O1 <sup>#4</sup> | 75.08(15)  | 117.72(16) | 117.50(14) |
| O3 <sup>#1</sup> -RE1-O2 <sup>#4</sup> | 116.53(15) | 140.25(15) | 140.32(14) |
| O3 <sup>#1</sup> -RE1-O4               | 140.31(17) | 72.73(15)  | 72.95(15)  |
| O3 <sup>#1</sup> -RE1-O4 <sup>#3</sup> | 73.46(17)  | 75.62(15)  | 75.20(15)  |
| O3 <sup>#1</sup> -RE1-O5 <sup>#1</sup> | 74.85(16)  | 127.44(15) | 127.21(14) |
| O4-RE1-O1 <sup>#4</sup>                | 127.86(16) | 71.00(15)  | 70.82(14)  |
| O4-RE1-O5 <sup>#1</sup>                | 139.42(16) | 138.37(15) | 138.99(14) |
| O4 <sup>#3</sup> -RE1-O1 <sup>#4</sup> | 118.50(17) | 118.60(15) | 118.59(15) |
| O4 <sup>#3</sup> -RE1-O2 <sup>#4</sup> | 94.46(16)  | 94.93(14)  | 95.02(14)  |
| O4 <sup>#3</sup> -RE1-O4               | 67.0(2)    | 67.79(19)  | 67.58(17)  |
| O4 <sup>#3</sup> -RE1-O5 <sup>#1</sup> | 143.07(15) | 143.08(15) | 142.85(14) |
| O5 <sup>#1</sup> -RE1-O1 <sup>#4</sup> | 69.88(16)  | 70.40(15)  | 70.33(14)  |
| O2-Te1-O5 <sup>#6</sup>                | 164.95(18) | 165.17(17) | 165.18(17) |
| O4-Te1-O2                              | 90.19(19)  | 90.18(19)  | 90.07(17)  |
| O4-Te1-O5                              | 95.3(2)    | 96.04(19)  | 96.02(18)  |
| O4-Te1-O5 <sup>#6</sup>                | 84.87(19)  | 84.73(19)  | 85.08(18)  |
| O5-Te1-O2                              | 89.91(19)  | 90.66(18)  | 90.45(18)  |
| O5-Te1-O5 <sup>#6</sup>                | 76.5(2)    | 76.1(2)    | 76.2(2)    |
| O1-B1-O2                               | 115.4(6)   | 115.5(6)   | 116.2(5)   |
| O1-B1-O3                               | 125.3(7)   | 125.5(6)   | 125.6(6)   |
| O3-B1-O2                               | 118.9(6)   | 118.8(6)   | 118.0(5)   |

---

Symmetry transformations used to generate equivalent atoms:

#1: 1-X, 0.5+Y, 1.5-Z; #2: 1-X, -0.5+Y, 1.5-Z; #3: 1-X, -Y, 1-Z; #4: 1.5-X, -0.5+Y, +Z; #5: -0.5+X, +Y, 1.5-Z; #6: 1-X, 1-Y, 1-Z; #7: 1.5-X, 0.5+Y, +Z; #8: 0.5+X, +Y, 1.5-Z;

**Table S4.** Assignment of the absorption peaks observed in the IR spectrum of  $\beta$ -LaTeBO<sub>5</sub> and RETeBO<sub>5</sub> (RE = Y, Gd, Tb).

| Mode description           | Absorption peaks (cm <sup>-1</sup> ) |                    |                     |                     |
|----------------------------|--------------------------------------|--------------------|---------------------|---------------------|
|                            | $\beta$ -LaTeBO <sub>5</sub>         | YTeBO <sub>5</sub> | GdTeBO <sub>5</sub> | TbTeBO <sub>5</sub> |
| $\nu_{as}(\text{BO}_3)$    | 1503, 1319, 1170                     | 1328, 1181         | 1328, 1170          | 1328, 1174          |
| $\nu_s(\text{BO}_3)$       | 916                                  | 943                | 937                 | 935                 |
| $\delta(\text{BO}_3)$      |                                      | 592                | 582                 | 586                 |
| $\nu_{s,as}(\text{TeO}_3)$ | 688, 445                             | 705, 657, 470      | 703, 655, 460       | 703, 653, 462       |



**Table S5.** The space group, Te- $\pi$  groups FBB, energy gap and optical properties comparison of containing Te(IV) and  $\pi$ -conjugate groups systems.

| S/N                        | Compounds                                                                          | Space Group  | Te- $\pi$ groups FBB                                                 | $E_g$ /(eV) | Birefringence | Ref.      |
|----------------------------|------------------------------------------------------------------------------------|--------------|----------------------------------------------------------------------|-------------|---------------|-----------|
| <b>Tellurite Borate</b>    |                                                                                    |              |                                                                      |             |               |           |
| 1                          | $\text{Ca}_{13}\text{Te}_{4.42}\text{O}_{15}(\text{BO}_3)_4(\text{OH})_3$          | $P2_1/c$     | $[\text{BO}_3]^{3-}$ , $[\text{TeO}_6]^{6-}$ , $[\text{TeO}_3]^{2-}$ | N/A         | N/A           | 1         |
| 2                          | $\text{Rb}_3\text{BaTeB}_7\text{O}_{15}$                                           | $P2_1/n$     | 2D $[\text{TeB}_7\text{O}_{15}]$                                     | 4.3         | 0.035@1064nm  | 2         |
| 3                          | $\text{K}_3\text{BaTeB}_7\text{O}_{15}$                                            | $P2_1/n$     | 2D $[\text{TeB}_7\text{O}_{15}]$                                     | 4.2         | 0.030@1064nm  | 3         |
| 4                          | $\text{PbTeB}_4\text{O}_9$                                                         | $P-1$        | 2D $[\text{B}_4\text{TeO}_8]$                                        | 4.58        | 0.099@1064nm  | 4         |
| 5                          | $\text{TeB}_4\text{O}_8$                                                           | $C2/c$       | 3D $[\text{TeB}_4\text{O}_8]$                                        | N/A         | N/A           | 5         |
| 6                          | $\text{Te}_2\text{B}_2\text{O}_7$                                                  | $Pna2_1$     | 3D $[\text{Te}_2\text{B}_2\text{O}_7]$                               | 4.8         | N/A           | 6         |
| 7                          | $\alpha\text{-LaTeBO}_5$                                                           | $Pbca$       | 0D $[\text{Te}_2\text{O}_4(\text{BO}_3)_2]^{6-}$                     | 4.2         | 0.080@1064nm  | 7         |
| 8                          | $\text{GdTeBO}_5$                                                                  | $Pbca$       | 0D $[\text{Te}_2\text{O}_4(\text{BO}_3)_2]^{6-}$                     | 4.42        | 0.074@546nm   | This work |
| 9                          | $\text{YTeBO}_5$                                                                   | $Pbca$       | 0D $[\text{Te}_2\text{O}_4(\text{BO}_3)_2]^{6-}$                     | 4.46        | 0.080@546nm   | This work |
| 10                         | $\text{TbTeBO}_5$                                                                  | $Pbca$       | 0D $[\text{Te}_2\text{O}_4(\text{BO}_3)_2]^{6-}$                     | 3.74        | N/A           | This work |
| 11                         | $\beta\text{-LaTeBO}_5$                                                            | $P2_1/c$     | 1D $[\text{BO}_2]_{\infty}$ , $[\text{TeO}_3]^{2-}$                  | 4.08        | 0.134@546nm   | This work |
| <b>Tellurite Carbonate</b> |                                                                                    |              |                                                                      |             |               |           |
| 1                          | $\text{CaTeO}_2(\text{CO}_3)$                                                      | $Pbca$       | $[\text{TeO}_3]^{2-}$ , $[\text{CO}_3]^{2-}$                         | N/A         | N/A           | 8         |
| 2                          | $\text{Rb}_2\text{Zn}(\text{TeO}_3)(\text{CO}_3)\cdot\text{H}_2\text{O}$           | $I2/c$       | $[\text{TeO}_3]^{2-}$ , $[\text{CO}_3]^{2-}$                         | N/A         | N/A           | 9         |
| 3                          | $\text{LiKTeO}_2(\text{CO}_3)$                                                     | $P2_1/n$     | 0D $[\text{Te}_2\text{C}_2\text{O}_{10}]^{4-}$                       | 4.58        | 0.029@1064nm  | 10        |
| 4                          | $\text{NaKTeO}_2(\text{CO}_3)$                                                     | $P2_1/n$     | 0D $[\text{Te}_2\text{C}_2\text{O}_{10}]^{4-}$                       | 4.27        | 0.040@1064nm  | 10        |
| <b>Tellurite Nitrate</b>   |                                                                                    |              |                                                                      |             |               |           |
| 1                          | $\text{Bi}_2\text{Te}_2\text{O}_6(\text{NO}_3)_2(\text{OH})_2(\text{H}_2\text{O})$ | $P2_12_12_1$ | $[\text{TeO}_3]^{2-}$ , $[\text{TeO}_6]^{6-}$ , $[\text{NO}_3]^-$    | 4           | N/A           | 11        |
| 2                          | $\text{AgTeO}_2\text{NO}_3$                                                        | $Pbcn$       | $[\text{TeO}_4]^{4-}$ , $[\text{NO}_3]^-$                            | N/A         | N/A           | 12        |
| 3                          | $[\text{Bi}(\text{TeO}_3)](\text{NO}_3)$                                           | $P2_1/c$     | $[\text{TeO}_3]^{2-}$ , $[\text{NO}_3]^-$                            | 3.62        | N/A           | 13        |
| 4                          | $\text{Bi}_3(\mu_3\text{-OH})(\text{TeO}_3)_3(\text{NO}_3)_2$                      | $P-62m$      | $[\text{Te}_3\text{O}_{10}]^{8-}$ , $[\text{NO}_3]^-$                | 3.31        | N/A           | 14        |
| 5                          | $\text{La}(\text{TeO}_3)(\text{NO}_3)$                                             | $P2_1/n$     | $[\text{TeO}_3]^{2-}$ , $[\text{NO}_3]^-$                            | 3.7         | N/A           | 15        |
| 6                          | $\text{Nd}(\text{TeO}_3)(\text{NO}_3)$                                             | $P2_1/n$     | $[\text{TeO}_3]^{2-}$ , $[\text{NO}_3]^-$                            | 3.6         | N/A           | 15        |
| 7                          | $\text{Eu}(\text{TeO}_3)(\text{NO}_3)$                                             | $Cmca$       | $[\text{TeO}_4]^{4-}$ , $[\text{NO}_3]^-$                            | 3.7         | N/A           | 15        |
| 8                          | $\text{Gd}(\text{TeO}_3)(\text{NO}_3)$                                             | $Cmca$       | $[\text{TeO}_4]^{4-}$ , $[\text{NO}_3]^-$                            | 3.8         | N/A           | 15        |
| 9                          | $\text{Dy}(\text{TeO}_3)(\text{NO}_3)$                                             | $Cmca$       | $[\text{TeO}_4]^{4-}$ , $[\text{NO}_3]^-$                            | 3.8         | N/A           | 15        |
| 10                         | $\text{Er}(\text{TeO}_3)(\text{NO}_3)$                                             | $Cmca$       | $[\text{TeO}_4]^{4-}$ , $[\text{NO}_3]^-$                            | 3.8         | N/A           | 15        |
| 11                         | $\text{Y}(\text{TeO}_3)(\text{NO}_3)$                                              | $Cmca$       | $[\text{TeO}_4]^{4-}$ , $[\text{NO}_3]^-$                            | 4.4         | N/A           | 15        |
| 12                         | $(\text{SbTeO}_3)(\text{NO}_3)$                                                    | $Pca2_1$     | $[\text{TeO}_3]^{2-}$ , $[\text{NO}_3]^-$                            | 4.32        | 0.081@546nm   | 16        |

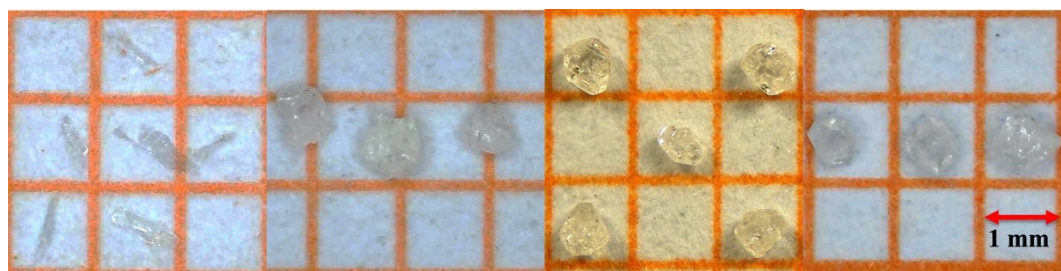

$\beta$ -LaTeBO<sub>5</sub>

YTeBO<sub>5</sub>

GdTeBO<sub>5</sub>

TbTeBO<sub>5</sub>

**Figure S1.** The photographs of crystals for  $\beta$ -LaTeBO<sub>5</sub> and RETeBO<sub>5</sub> (RE = Y, Gd, Tb).

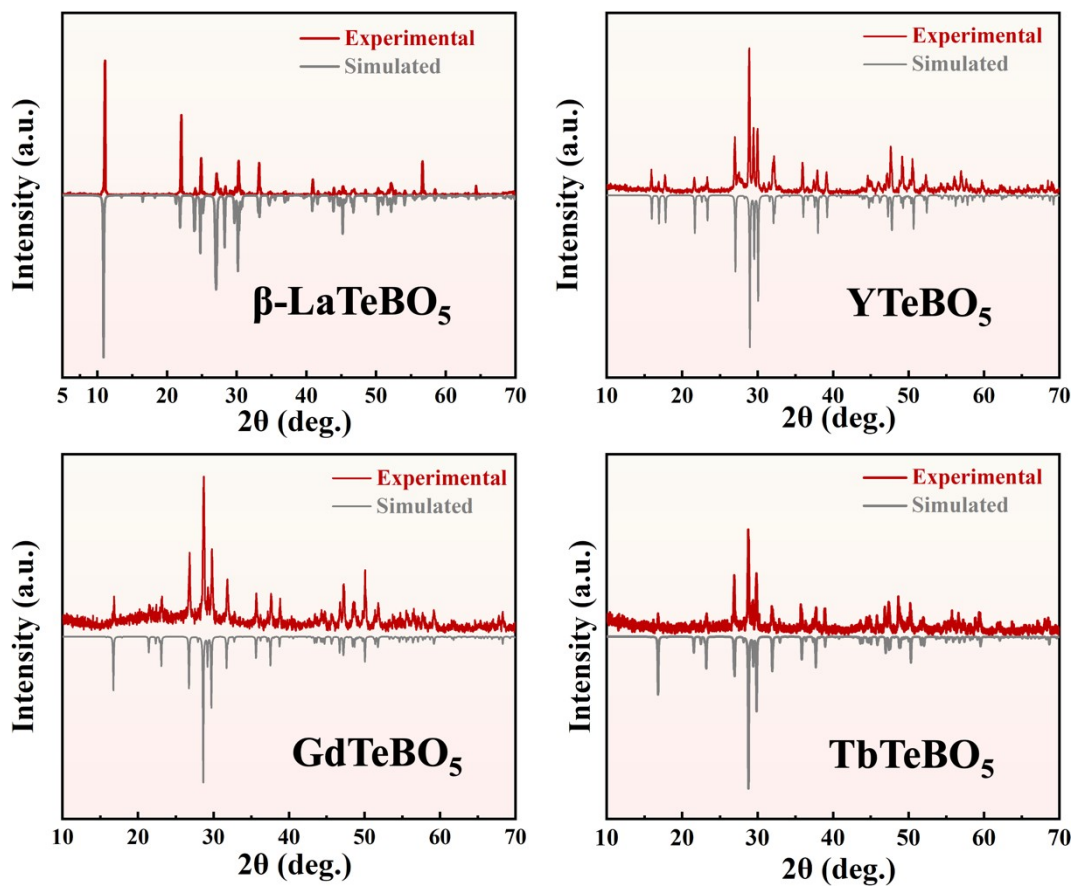

**Figure S2.** Simulated and experimental powder X-ray diffraction patterns of  $\beta$ -LaTeBO<sub>5</sub> and RETeBO<sub>5</sub> (RE = Y, Gd, Tb) in room temperature.

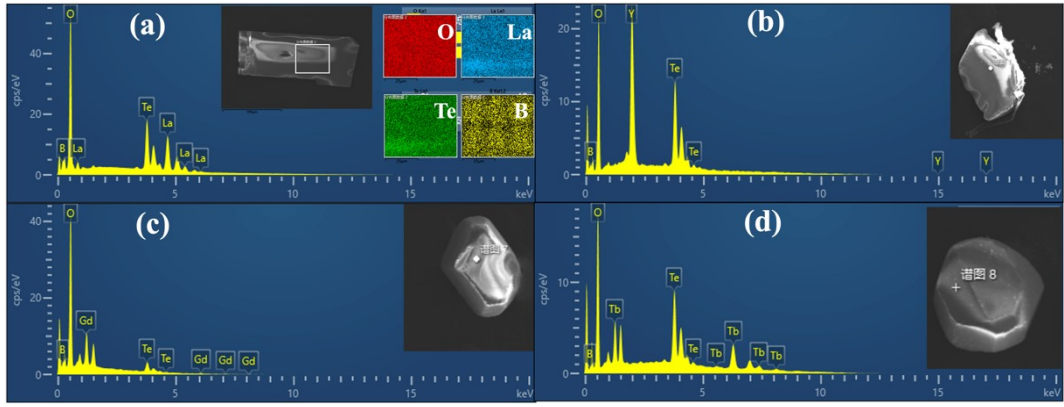

**Figure S3.** EDS spectrum of  $\beta$ -LaTeBO<sub>5</sub> (a) and RETeBO<sub>5</sub> (RE = Y (b), Gd (c), Tb (d)).

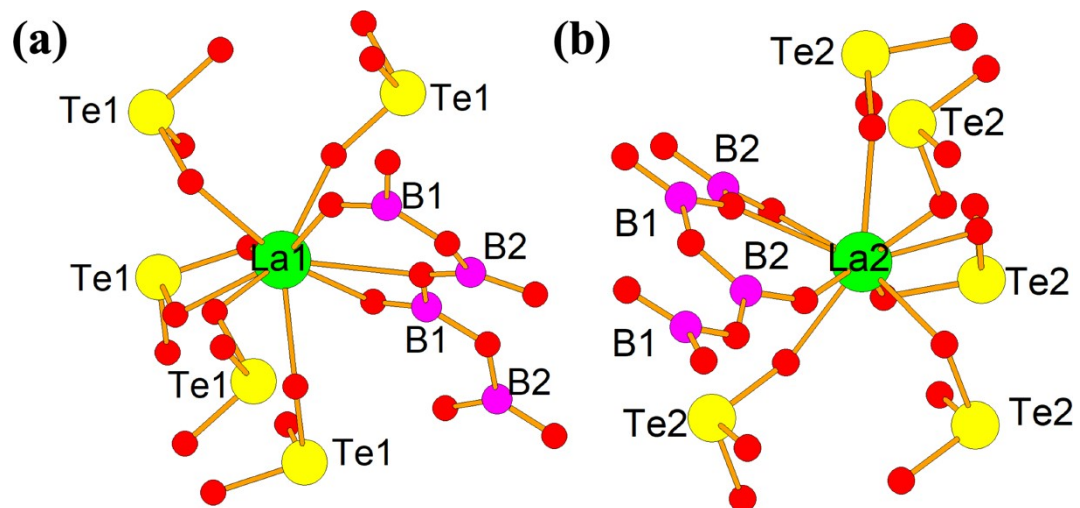

**Figure S4.** The coordination environment around La (1) atom (a) and La (2) atom (b) in  $\beta$ -LaTeBO<sub>5</sub>.

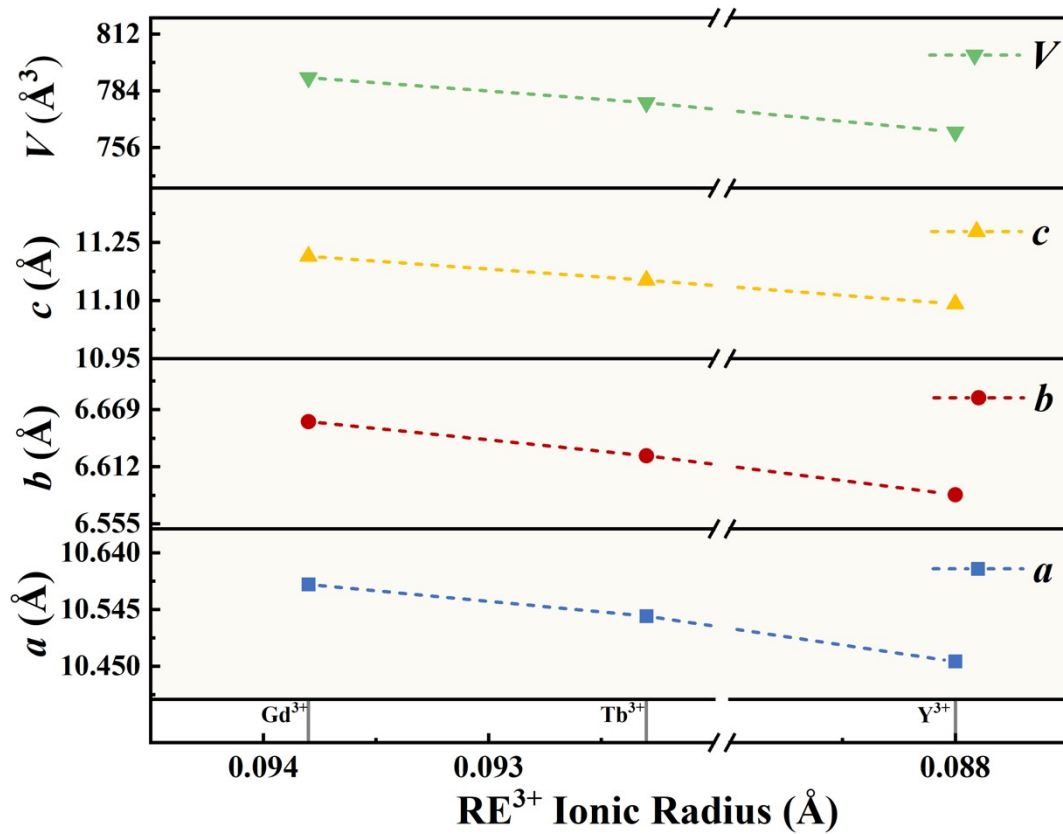

**Figure S5.** Plot of lattice constant (which contains the  $a$ ,  $b$ ,  $c$  and  $V$ ) for  $\text{RETeBO}_5$  ( $\text{RE} = \text{Y, Gd, Tb}$ ) against the  $\text{RE}^{3+}$  ionic radius.

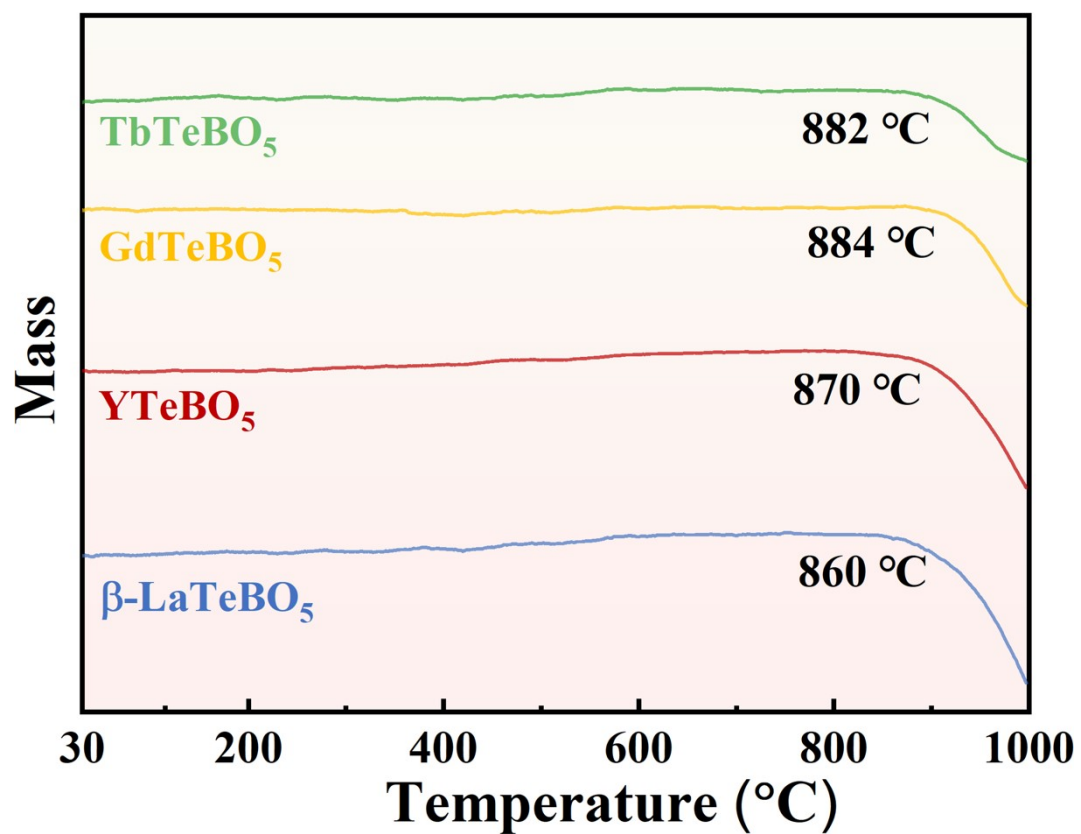

Figure S6. TG curves of  $\beta$ -LaTeBO<sub>5</sub> and RETeBO<sub>5</sub> (RE = Y, Gd, Tb).

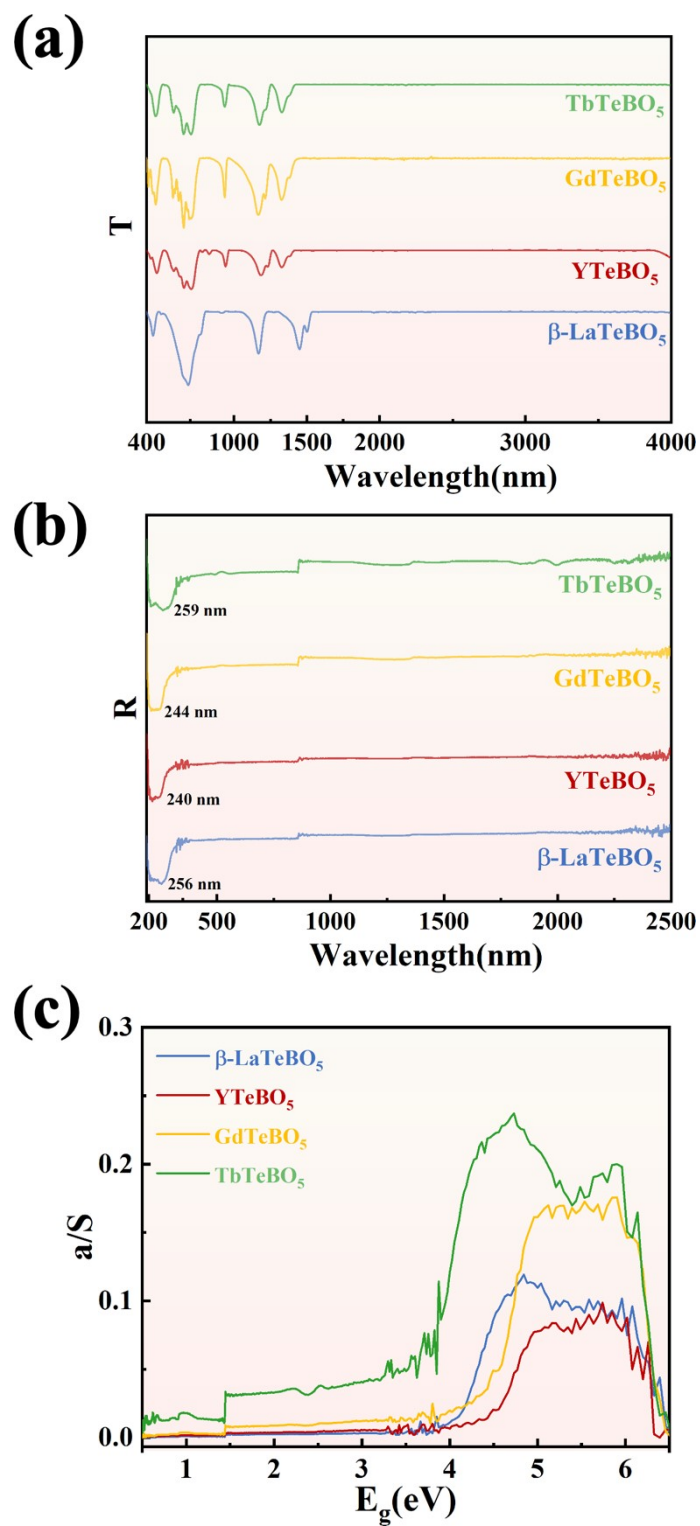

**Figure S7.** Spectrum of  $\beta$ -LaTeBO<sub>5</sub> and RETeBO<sub>5</sub> (RE = Y, Gd, Tb): (a) IR spectrum; (b) UV-vis-NIR diffuse reflectance spectrum; (c) Converted F(R)-versus-Energy plot.



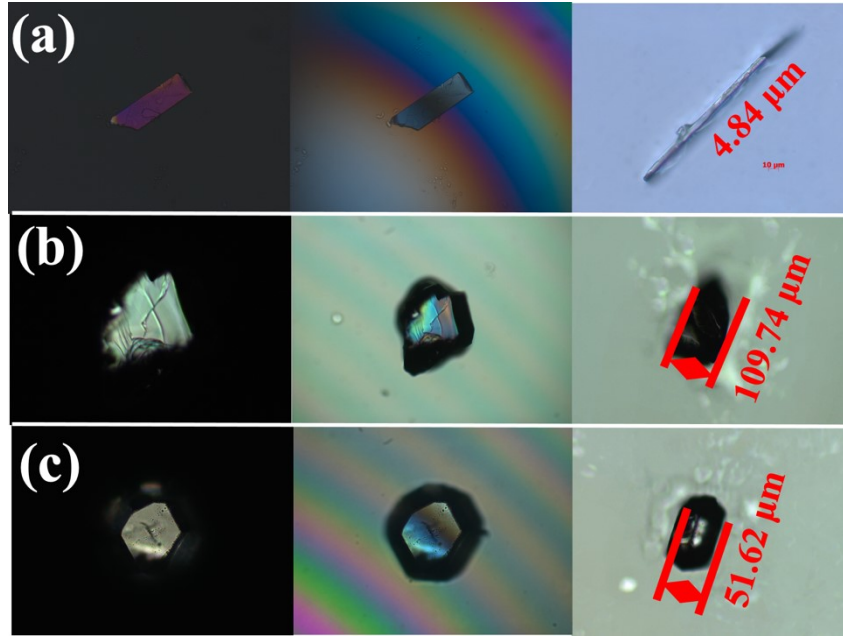

**Figure S8.** The positive and negative rotation of compensatory, and the thickness of  $\beta$ - $\text{LaTeBO}_5$  (a),  $\text{YTeBO}_5$  (b) and  $\text{GdTeBO}_5$  (c).

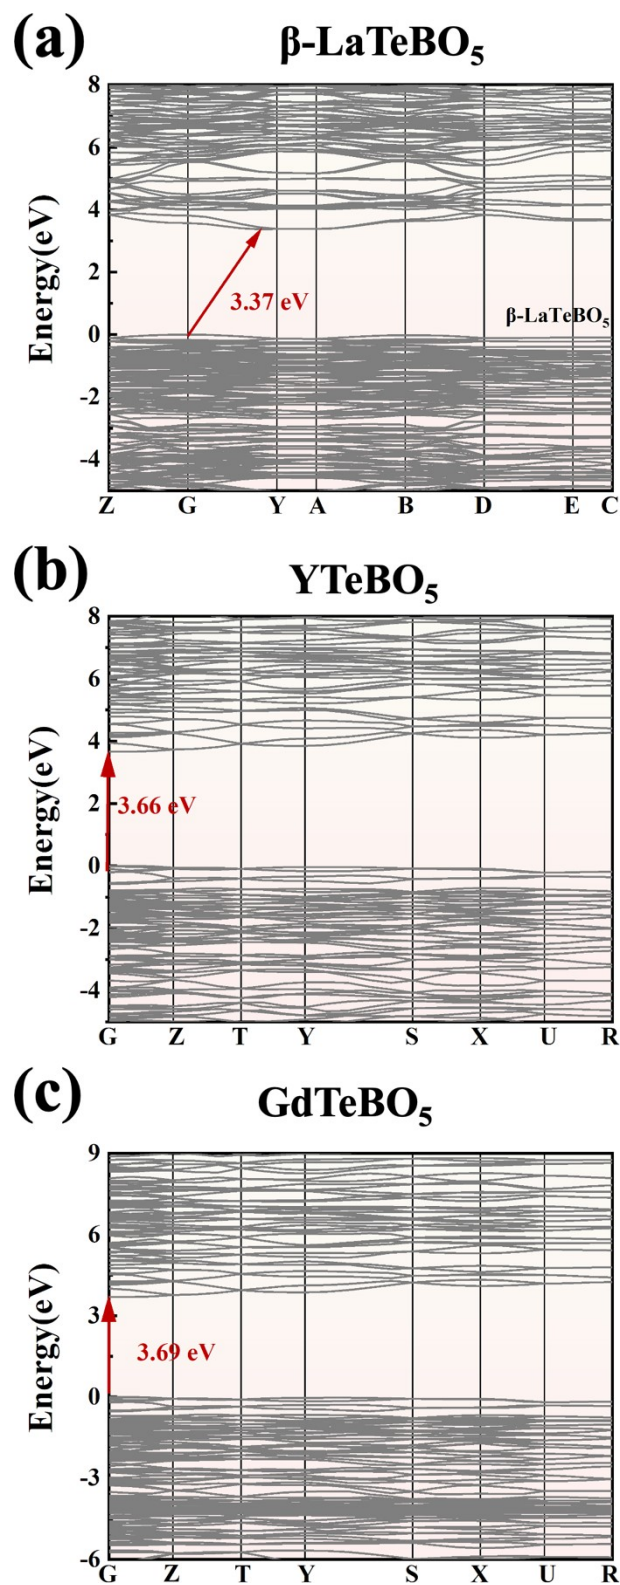

**Figure S9.** The calculated band structure of  $\beta\text{-LaTeBO}_5$  (a) and  $\text{RETeBO}_5$  (RE = Y(b), Gd(c)).

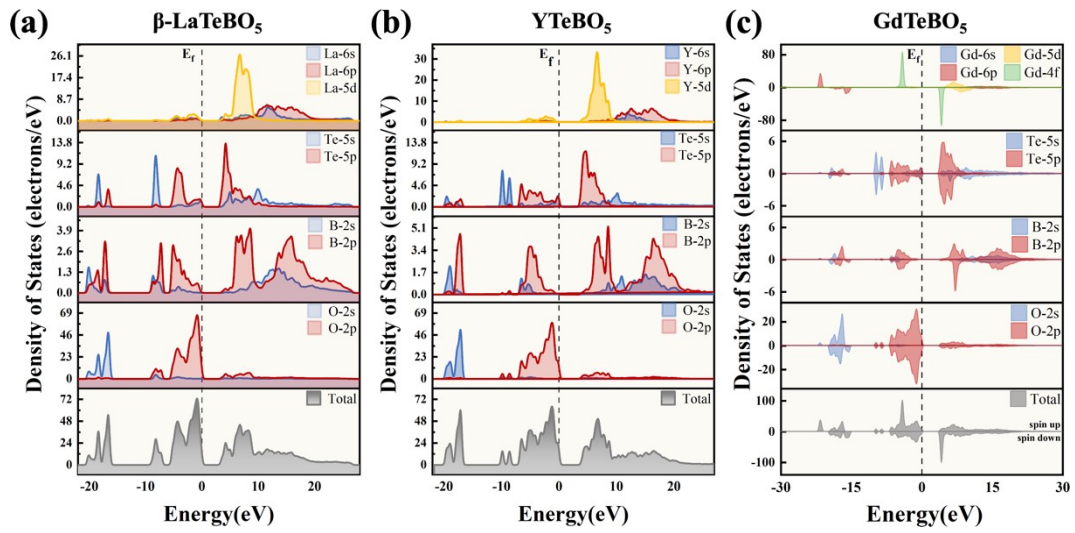

**Figure S10.** Total and partial density of states of  $\beta$ -LaTeBO<sub>5</sub> (a) and RETeBO<sub>5</sub> (RE = Y(b), Gd(c)).

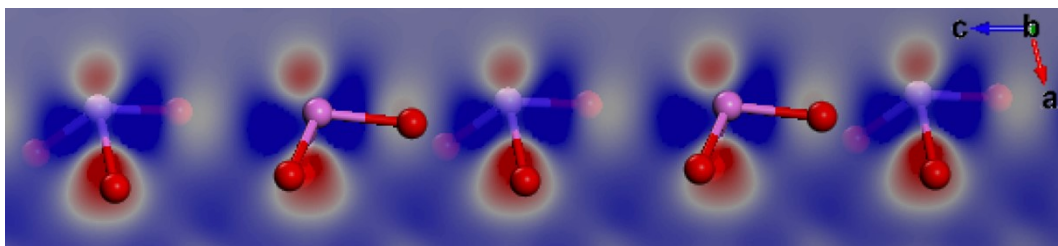

**Figure S11.** Electron density difference maps of  $[\text{TeO}_3]^{2-}$  units in  $\beta\text{-LaTeBO}_5$  along the  $b$  axis.

## References

1. M. Weil, G. Heymann and H. Huppertz, The High-Pressure Polymorph of  $\text{Ca}_4\text{Te}_5\text{O}_{14}$  and the Mixed-Valent Compound  $\text{Ca}_{13}\text{Te}^{\text{VI}}_{2/3}\text{Te}^{\text{IV}}_{3.75}\text{O}_{15}(\text{BO}_3)_4(\text{OH})_3$ , *Eur. J. Inorg. Chem.*, 2016, **2016**, 3574-3579.
2. J. Sun, M. Mutailipu, S. Cheng, Z. Yang and S. Pan,  $\text{Rb}_3\text{BaTeB}_7\text{O}_{15}$ : a novel  $[\text{B}_7\text{O}_{16}]$  fundamental building block in a new telluroborate with  $[\text{TeO}_3]$  polyhedra, *Dalton Trans.*, 2020, **49**, 8911-8917.
3. T. Zhang, L.-H. Deng, W.-L. Xie, C.-Y. Bai, J.-W. Feng, J.-J. Zheng and D.-H. An,  $\text{K}_3\text{BaTeB}_7\text{O}_{15}$ : A new borotellurite with mixed metal cations, *J. Mol. Struct.*, 2022, **1252**, 132181.
4. R. Zhang, A. Tudi, X. Yang, X. Wang, Z. Yang, S. Han and S. Pan,  $\text{PbTeB}_4\text{O}_9$ : a lead tellurium borate with unprecedented fundamental building block  $[\text{B}_4\text{O}_{10}]$  and large birefringence, *Chem. Commun.*, 2024, **60**, 340-343.
5. R. Ziegler, G. Heymann and H. Huppertz, Synthesis and crystal structure of the first ternary tellurium borate  $\text{TeB}_4\text{O}_8$ , *Z. Anorg. Allg. Chem.*, 2022, **648**, e202200229.
6. R. Ziegler, F. R. S. Purtscher, T. S. Hofer, G. Heymann and H. Huppertz, Single-crystal structure and theoretical calculations of the second ternary tellurium borate  $\text{Te}_2\text{B}_2\text{O}_7$ , *J. Solid State Chem.*, 2024, **330**, 124458.
7. J. Wang, H. Wu, H. Yu, Z. Hu, J. Wang and Y. Wu,  $\text{LaTeBO}_5$ : a new borotellurite with a large birefringence activated by the highly distorted  $[\text{Te}^{(\text{iv})}\text{O}_4]$  group, *Dalton Trans.*, 2021, **50**, 12404-12407.
8. R. Fischer, F. Pertlik and J. Zemmann, The crystal structure of mroseite,  $\text{CaTeO}_2(\text{CO}_3)$ , *Can. Mineral.*, 1975, **13**, 383-387.
9. F. Eder, B. Stöger and M. Weil, Order-disorder (OD) structures of  $\text{Rb}_2\text{Zn}(\text{TeO}_3)(\text{CO}_3)\cdot\text{H}_2\text{O}$  and  $\text{Na}_2\text{Zn}_2\text{Te}_4\text{O}_{11}$ , *Z. Kristallogr.*, 2022, **237**, 329-341.
10. P. F. Chen, C. L. Hu, M. Y. Cao, X. Y. Zhang and J. G. Mao,  $\text{AKTeO}_2(\text{CO}_3)$  (A = Li, Na): The First Carbonatotellurites Featuring a Zero-Dimensional  $[\text{Te}_2\text{C}_2\text{O}_{10}]^{4-}$  Cluster and a Wide Band Gap, *Inorg. Chem.*, 2023, **62**, 6864-6870.
11. S. Lee, H. Jo and K. M. Ok,  $\text{Bi}_2\text{Te}_2\text{O}_6(\text{NO}_3)_2(\text{OH})_2(\text{H}_2\text{O})$ : A layered bismuth tellurium nitrate hydroxide with multiple noncentrosymmetric chromophores, *J. Solid State Chem.*, 2019, **271**, 298-302.
12. C. Olsson, L.-G. Johansson and S. Kazikowski., Structure of Silver Telluryl Nitrate,  $\text{AgTeO}_2\text{NO}_3$ , *Acta Cryst.*, 1988, **C44**, 427-429.
13. C.-Y. Meng, M.-F. Wei, L. Geng, P.-Q. Hu, M.-X. Yu and W.-D. Cheng, Synthesis, structure, and characterization of two new bismuth(III) selenite/tellurite nitrates:  $[(\text{Bi}_3\text{O}_2)(\text{SeO}_3)_2](\text{NO}_3)$  and  $[\text{Bi}(\text{TeO}_3)](\text{NO}_3)$ , *J. Solid State Chem.*, 2016, **239**, 46-52.
14. J. L. Song and C. Qian, Syntheses, Crystal Structures, and Properties of Two Quaternary Selenite/Tellurite-Nitrates with Formula of  $\text{Bi}(\text{SeO}_3)(\text{NO}_3)$  and  $\text{Bi}_3(\mu_3\text{-OH})(\text{TeO}_3)_3(\text{NO}_3)_2$ , *ChemistrySelect*, 2017, **2**, 1681-1685.
15. H. E. Lee, H. Jo, M. H. Lee and K. M. Ok, Unique synthesis, structure determination, and optical properties of seven new layered rare earth tellurite nitrates,  $\text{RE}(\text{TeO}_3)(\text{NO}_3)$  (RE = La, Nd, Eu, Gd, Dy, Er, and Y), *J. Alloys Compd.*, 2021, **851**, 156855.
16. B. Zhang, C. L. Hu, J. G. Mao and F. Kong, Fully tricoordinated assembly unveils a pioneering nonlinear optical crystal  $(\text{SbTeO}_3)(\text{NO}_3)$ , *Chem. Sci.*, 2024, **15**, 18549-18556
